# Supplementary material for: Factors influencing the participation of gastroenterologists and hepatologists in clinical research
Source: PubMed Central journal article supplement (PMC2572062; doi:10.1186/1472-6963-8-208), 2008-10-08
Supplement: 1472-6963-8-208-S1.pdf [file 1472-6963-8-208-S1.pdf]

## Appendix. Survey of Involvement and Participation in Clinical Trials

Physicians are frequently asked to participate in clinical research and are increasingly presented with a wide variety of research projects from which to choose. This questionnaire aims to define the factors which influence hepatologists to participate in clinical research.

### I. DEMOGRAPHIC AND PRACTICE INFORMATION

|                                                                                                                                                                                                                                                                                          |                          |                                                                                                                                                                                                                                                                                              |                          |                          |                          |  |
|------------------------------------------------------------------------------------------------------------------------------------------------------------------------------------------------------------------------------------------------------------------------------------------|--------------------------|----------------------------------------------------------------------------------------------------------------------------------------------------------------------------------------------------------------------------------------------------------------------------------------------|--------------------------|--------------------------|--------------------------|--|
| <b>1. Gender</b> Male <input type="checkbox"/> Female <input type="checkbox"/>                                                                                                                                                                                                           |                          | <b>2. Race/ Ethnicity (Optional)</b>                                                                                                                                                                                                                                                         |                          |                          |                          |  |
| <b>3. Age</b><br>25-30 years <input type="checkbox"/><br>31-40 years <input type="checkbox"/><br>41- 55 years <input type="checkbox"/><br>56-70 years <input type="checkbox"/><br>>70 years <input type="checkbox"/>                                                                     |                          | African American <input type="checkbox"/><br>Asian <input type="checkbox"/><br>Caucasian <input type="checkbox"/><br>Hispanic <input type="checkbox"/><br>Other (please specify) _____ <input type="checkbox"/>                                                                              |                          |                          |                          |  |
| <b>4. Specialty</b><br>Gastroenterologist <input type="checkbox"/><br>Hepatologist <input type="checkbox"/><br>Infectious Diseases specialist <input type="checkbox"/><br>Internal Medicine specialist <input type="checkbox"/><br>Other (please specify) _____ <input type="checkbox"/> |                          | <b>5. Practice setting</b><br>Primary Care Center <input type="checkbox"/><br>Tertiary Care/ Academic Facility <input type="checkbox"/><br>Community Hospital <input type="checkbox"/><br>Private Practice <input type="checkbox"/><br>Other (please specify) _____ <input type="checkbox"/> |                          |                          |                          |  |
| <b>6. Current degree</b><br>MD or equivalent <input type="checkbox"/><br>PhD <input type="checkbox"/><br>MD/PhD <input type="checkbox"/><br>Other (please specify) _____ <input type="checkbox"/>                                                                                        |                          | <b>7. Years in practice</b><br>< 5 years <input type="checkbox"/><br>6 – 10 years <input type="checkbox"/><br>11 – 20 years <input type="checkbox"/><br>> 20 years <input type="checkbox"/>                                                                                                  |                          |                          |                          |  |
| <b>8. Please indicate the percentage of time you spend on each of the following professional activities:</b>                                                                                                                                                                             |                          |                                                                                                                                                                                                                                                                                              |                          |                          |                          |  |
|                                                                                                                                                                                                                                                                                          | 0%                       | 1 – 25%                                                                                                                                                                                                                                                                                      | 26 – 50%                 | 51 – 75%                 | > 75%                    |  |
| Research-Basic                                                                                                                                                                                                                                                                           | <input type="checkbox"/> | <input type="checkbox"/>                                                                                                                                                                                                                                                                     | <input type="checkbox"/> | <input type="checkbox"/> | <input type="checkbox"/> |  |
| Research-Clinical                                                                                                                                                                                                                                                                        | <input type="checkbox"/> | <input type="checkbox"/>                                                                                                                                                                                                                                                                     | <input type="checkbox"/> | <input type="checkbox"/> | <input type="checkbox"/> |  |
| Research-Academic                                                                                                                                                                                                                                                                        | <input type="checkbox"/> | <input type="checkbox"/>                                                                                                                                                                                                                                                                     | <input type="checkbox"/> | <input type="checkbox"/> | <input type="checkbox"/> |  |
| Clinical- academic                                                                                                                                                                                                                                                                       | <input type="checkbox"/> | <input type="checkbox"/>                                                                                                                                                                                                                                                                     | <input type="checkbox"/> | <input type="checkbox"/> | <input type="checkbox"/> |  |
| Clinical-Private-Practice                                                                                                                                                                                                                                                                | <input type="checkbox"/> | <input type="checkbox"/>                                                                                                                                                                                                                                                                     | <input type="checkbox"/> | <input type="checkbox"/> | <input type="checkbox"/> |  |
| Industry                                                                                                                                                                                                                                                                                 | <input type="checkbox"/> | <input type="checkbox"/>                                                                                                                                                                                                                                                                     | <input type="checkbox"/> | <input type="checkbox"/> | <input type="checkbox"/> |  |
| Other (please specify) _____                                                                                                                                                                                                                                                             | <input type="checkbox"/> | <input type="checkbox"/>                                                                                                                                                                                                                                                                     | <input type="checkbox"/> | <input type="checkbox"/> | <input type="checkbox"/> |  |

### II. EXPERIENCE WITH CLINICAL THERAPEUTIC TRIALS

|                                                                                                                  |                                                   |                                             |                                              |                                           |
|------------------------------------------------------------------------------------------------------------------|---------------------------------------------------|---------------------------------------------|----------------------------------------------|-------------------------------------------|
| <b>9. How many clinical trials have you participated in as an investigator during the last <u>12 months</u>?</b> | none<br><input type="checkbox"/>                  | 1 – 4<br>trials<br><input type="checkbox"/> | 5 – 10<br>trials<br><input type="checkbox"/> | >10<br>trials<br><input type="checkbox"/> |
| <b>10. How many clinical trials have you participated in as an investigator during the last <u>5 years</u>?</b>  | none<br><input type="checkbox"/><br>(skip to Q16) | 1 – 4<br>trials<br><input type="checkbox"/> | 5 – 10<br>trials<br><input type="checkbox"/> | >10<br>trials<br><input type="checkbox"/> |

**11. Please indicate the type(s) of clinical trials you have participated in as an investigator:**

- Drug trials (Human studies)
- Basic Science Research
- Non-drug trials (eg. Procedural )
- Non-drug epidemiological research
- Other (please specify) \_\_\_\_\_

**12. Please indicate the funding source for clinical trials you have participated in as an investigator:**

- Pharmaceutical company
- Government institutions
- Non government/ charitable/ philanthropic agencies
- University/ Hospital funding
- Other (please specify) \_\_\_\_\_

**13. Please indicate in order from 1 to 5 your preference for source of funding for trials (1 = most preferred, 5 = least preferred or N/A ):**

- Pharmaceutical company \_\_\_\_\_
- Government institutions \_\_\_\_\_
- Non government/ charitable/ philanthropic agencies \_\_\_\_\_
- University/ Hospital funding \_\_\_\_\_
- Other (please specify) \_\_\_\_\_

**14. Regardless of whether you currently participate in clinical trials or not, please indicate the importance of the factors below in influencing your decision to enroll patients in clinical trials.**

|                                                           | Extremely important      | Very Important           | Somewhat important       | Not at all important     | Not sure                 |
|-----------------------------------------------------------|--------------------------|--------------------------|--------------------------|--------------------------|--------------------------|
| Patient's level of education                              | <input type="checkbox"/> | <input type="checkbox"/> | <input type="checkbox"/> | <input type="checkbox"/> | <input type="checkbox"/> |
| Patient's race/ethnicity                                  | <input type="checkbox"/> | <input type="checkbox"/> | <input type="checkbox"/> | <input type="checkbox"/> | <input type="checkbox"/> |
| Patient's socioeconomic status                            | <input type="checkbox"/> | <input type="checkbox"/> | <input type="checkbox"/> | <input type="checkbox"/> | <input type="checkbox"/> |
| Patient's ability to comprehend trial protocols           | <input type="checkbox"/> | <input type="checkbox"/> | <input type="checkbox"/> | <input type="checkbox"/> | <input type="checkbox"/> |
| Pressure from patient / patient's family members          | <input type="checkbox"/> | <input type="checkbox"/> | <input type="checkbox"/> | <input type="checkbox"/> | <input type="checkbox"/> |
| Concern about losing patient to follow up                 | <input type="checkbox"/> | <input type="checkbox"/> | <input type="checkbox"/> | <input type="checkbox"/> | <input type="checkbox"/> |
| Anticipated logistical problems (eg travel)               | <input type="checkbox"/> | <input type="checkbox"/> | <input type="checkbox"/> | <input type="checkbox"/> | <input type="checkbox"/> |
| Severity of disease                                       | <input type="checkbox"/> | <input type="checkbox"/> | <input type="checkbox"/> | <input type="checkbox"/> | <input type="checkbox"/> |
| Cost incurred by you or your department                   | <input type="checkbox"/> | <input type="checkbox"/> | <input type="checkbox"/> | <input type="checkbox"/> | <input type="checkbox"/> |
| Cost incurred by the patient                              | <input type="checkbox"/> | <input type="checkbox"/> | <input type="checkbox"/> | <input type="checkbox"/> | <input type="checkbox"/> |
| Patient's inability to comply or adhere to trial protocol | <input type="checkbox"/> | <input type="checkbox"/> | <input type="checkbox"/> | <input type="checkbox"/> | <input type="checkbox"/> |

**15. How important are the factors below in influencing your participation in clinical trials?**

|                                                                                        | Extremely important      | Very Important           | Somewhat important       | Not at all important     | Not sure                 |
|----------------------------------------------------------------------------------------|--------------------------|--------------------------|--------------------------|--------------------------|--------------------------|
| Easy access to clinical trials/therapy                                                 | <input type="checkbox"/> | <input type="checkbox"/> | <input type="checkbox"/> | <input type="checkbox"/> | <input type="checkbox"/> |
| Level of funding/ equitable compensation for time and effort associated with the trial | <input type="checkbox"/> | <input type="checkbox"/> | <input type="checkbox"/> | <input type="checkbox"/> | <input type="checkbox"/> |
| Relationship or previous experience with the institution conducting the trial          | <input type="checkbox"/> | <input type="checkbox"/> | <input type="checkbox"/> | <input type="checkbox"/> | <input type="checkbox"/> |
| Offer from sponsors to fund additional projects/ establish a research fund etc.        | <input type="checkbox"/> | <input type="checkbox"/> | <input type="checkbox"/> | <input type="checkbox"/> | <input type="checkbox"/> |
| Recommendation from peers                                                              | <input type="checkbox"/> | <input type="checkbox"/> | <input type="checkbox"/> | <input type="checkbox"/> | <input type="checkbox"/> |
| Industry marketing                                                                     | <input type="checkbox"/> | <input type="checkbox"/> | <input type="checkbox"/> | <input type="checkbox"/> | <input type="checkbox"/> |
| Intellectual pursuit                                                                   | <input type="checkbox"/> | <input type="checkbox"/> | <input type="checkbox"/> | <input type="checkbox"/> | <input type="checkbox"/> |

**16. Which factors prevent you from participating in clinical trials:**

|                                                                                | Completely prevents me   | Is a concern, but doesn't prevent me from participating | Not a concern            | Not sure                 |
|--------------------------------------------------------------------------------|--------------------------|---------------------------------------------------------|--------------------------|--------------------------|
| Increasing complexity of trials                                                | <input type="checkbox"/> | <input type="checkbox"/>                                | <input type="checkbox"/> | <input type="checkbox"/> |
| Excessive trial costs not covered by the trial sponsor                         | <input type="checkbox"/> | <input type="checkbox"/>                                | <input type="checkbox"/> | <input type="checkbox"/> |
| Complexity of Institutional Review Board requirements                          | <input type="checkbox"/> | <input type="checkbox"/>                                | <input type="checkbox"/> | <input type="checkbox"/> |
| Inferior trial medication(s) compared to standard therapy                      | <input type="checkbox"/> | <input type="checkbox"/>                                | <input type="checkbox"/> | <input type="checkbox"/> |
| Lack of specialized support staff                                              | <input type="checkbox"/> | <input type="checkbox"/>                                | <input type="checkbox"/> | <input type="checkbox"/> |
| Concern about sponsor control of trial decision-making, data, publication, etc | <input type="checkbox"/> | <input type="checkbox"/>                                | <input type="checkbox"/> | <input type="checkbox"/> |
| Too busy with clinical practice commitments                                    | <input type="checkbox"/> | <input type="checkbox"/>                                | <input type="checkbox"/> | <input type="checkbox"/> |
| Ethical considerations                                                         | <input type="checkbox"/> | <input type="checkbox"/>                                | <input type="checkbox"/> | <input type="checkbox"/> |
| Difficulty in accessing the appropriate patient population                     | <input type="checkbox"/> | <input type="checkbox"/>                                | <input type="checkbox"/> | <input type="checkbox"/> |
| Not interested in participating in sponsored clinical research                 | <input type="checkbox"/> | <input type="checkbox"/>                                | <input type="checkbox"/> | <input type="checkbox"/> |

**17. What is the likelihood of you enrolling the following patients in clinical therapeutic trials?**

|                                                    | Very likely              | Somewhat likely          | Not at all likely        | Not sure                 |
|----------------------------------------------------|--------------------------|--------------------------|--------------------------|--------------------------|
| Non English speaking patients                      | <input type="checkbox"/> | <input type="checkbox"/> | <input type="checkbox"/> | <input type="checkbox"/> |
| Patients > 65 yrs                                  | <input type="checkbox"/> | <input type="checkbox"/> | <input type="checkbox"/> | <input type="checkbox"/> |
| Unemployed patients                                | <input type="checkbox"/> | <input type="checkbox"/> | <input type="checkbox"/> | <input type="checkbox"/> |
| Patients with reduced numeracy and literacy skills | <input type="checkbox"/> | <input type="checkbox"/> | <input type="checkbox"/> | <input type="checkbox"/> |
| Patients with advanced disease                     | <input type="checkbox"/> | <input type="checkbox"/> | <input type="checkbox"/> | <input type="checkbox"/> |
| Uninsured patients                                 | <input type="checkbox"/> | <input type="checkbox"/> | <input type="checkbox"/> | <input type="checkbox"/> |

**18. Please indicate your level of interest for participating as an investigator in the following trials:**

|                                                                                                                                          | Very interested          | Somewhat interested      | Not at all interested    | Not sure                 |
|------------------------------------------------------------------------------------------------------------------------------------------|--------------------------|--------------------------|--------------------------|--------------------------|
| Phase I trials<br>(Initial introduction of an investigational new drug or pilot study to establish a safe dose range)                    | <input type="checkbox"/> | <input type="checkbox"/> | <input type="checkbox"/> | <input type="checkbox"/> |
| Phase II trials<br>(Controlled clinical studies conducted to evaluate the effectiveness of a drug for a particular condition)            | <input type="checkbox"/> | <input type="checkbox"/> | <input type="checkbox"/> | <input type="checkbox"/> |
| Phase III trials<br>(pre-marketing controlled studies to determine safety, efficacy and appropriate dosage for a particular condition)   | <input type="checkbox"/> | <input type="checkbox"/> | <input type="checkbox"/> | <input type="checkbox"/> |
| Phase IV trials<br>(Post marketing or open label studies to delineate additional information about drug risks, benefits and optimal use) | <input type="checkbox"/> | <input type="checkbox"/> | <input type="checkbox"/> | <input type="checkbox"/> |
| Trials with a study duration = 2 yrs                                                                                                     | <input type="checkbox"/> | <input type="checkbox"/> | <input type="checkbox"/> | <input type="checkbox"/> |
| Trials with a study duration > 2 yrs                                                                                                     | <input type="checkbox"/> | <input type="checkbox"/> | <input type="checkbox"/> | <input type="checkbox"/> |
| Trials with a placebo/ non treatment arm                                                                                                 | <input type="checkbox"/> | <input type="checkbox"/> | <input type="checkbox"/> | <input type="checkbox"/> |
| Trials involving invasive procedures                                                                                                     | <input type="checkbox"/> | <input type="checkbox"/> | <input type="checkbox"/> | <input type="checkbox"/> |

|                                                   |                          |                          |                          |                          |
|---------------------------------------------------|--------------------------|--------------------------|--------------------------|--------------------------|
| Trials with multiple arms and crossover protocols | <input type="checkbox"/> | <input type="checkbox"/> | <input type="checkbox"/> | <input type="checkbox"/> |
| Trials funded by pharmaceutical companies         | <input type="checkbox"/> | <input type="checkbox"/> | <input type="checkbox"/> | <input type="checkbox"/> |
| Trials funded by government agencies              | <input type="checkbox"/> | <input type="checkbox"/> | <input type="checkbox"/> | <input type="checkbox"/> |
| Trials funded by non government agencies          | <input type="checkbox"/> | <input type="checkbox"/> | <input type="checkbox"/> | <input type="checkbox"/> |

---

**19. Consider a 45 year old male with Hepatitis C cirrhosis (genotype 1) who is unresponsive to pegylated interferon and ribavirin therapy and requests further treatment. How likely are you to enroll this patient in each of these trials:**

---

**A.** A multi-center trial involving long term combination therapy for 5 years with the aim of reversing fibrosis. The trial includes multiple arms with varying doses. The trial is sponsored by a government institution which only funds the cost of the trial drug without reimbursement for additional costs.

|                          |                          |                          |                          |
|--------------------------|--------------------------|--------------------------|--------------------------|
| <b>Very likely</b>       | <b>Somewhat likely</b>   | <b>Not at all likely</b> | <b>Not sure</b>          |
| <input type="checkbox"/> | <input type="checkbox"/> | <input type="checkbox"/> | <input type="checkbox"/> |

---

**B.** A 6-month trial involving an oral agent with antiviral effects recommended for non-responders to standard therapy in phase II of clinical trial investigation. The trial includes multiple arms with varying doses. No significant side-effects were reported in phase I of drug evaluation. The trial is sponsored by a pharmaceutical company which funds all trial costs.

|                          |                          |                          |                          |
|--------------------------|--------------------------|--------------------------|--------------------------|
| <b>Very likely</b>       | <b>Somewhat likely</b>   | <b>Not at all likely</b> | <b>Not sure</b>          |
| <input type="checkbox"/> | <input type="checkbox"/> | <input type="checkbox"/> | <input type="checkbox"/> |

---

**C.** A 12-month trial of an intravenous agent with anti-fibrotic effects in phase III of development. Minimal side-effects were reported in phase I and II of drug evaluation. The trial includes multiple arms with varying doses and a non-treatment arm. The trial is sponsored by a biotechnology company which funds all trial costs and also provides additional funds for support staff.

|                          |                          |                          |                          |
|--------------------------|--------------------------|--------------------------|--------------------------|
| <b>Very likely</b>       | <b>Somewhat likely</b>   | <b>Not at all likely</b> | <b>Not sure</b>          |
| <input type="checkbox"/> | <input type="checkbox"/> | <input type="checkbox"/> | <input type="checkbox"/> |

**Thank you for your participation.**
